# Supplementary material
Source: PubMed Central journal article supplement (PMC7484240)

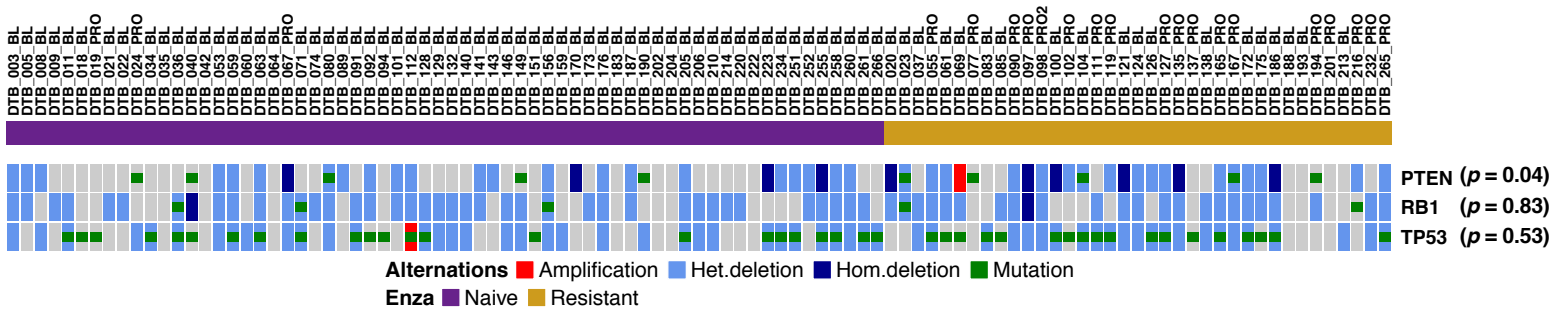

Supplementary Figure 1

Supplement: NIHMS1609735-supplement-1.pdf [file NIHMS1609735-supplement-1.pdf]

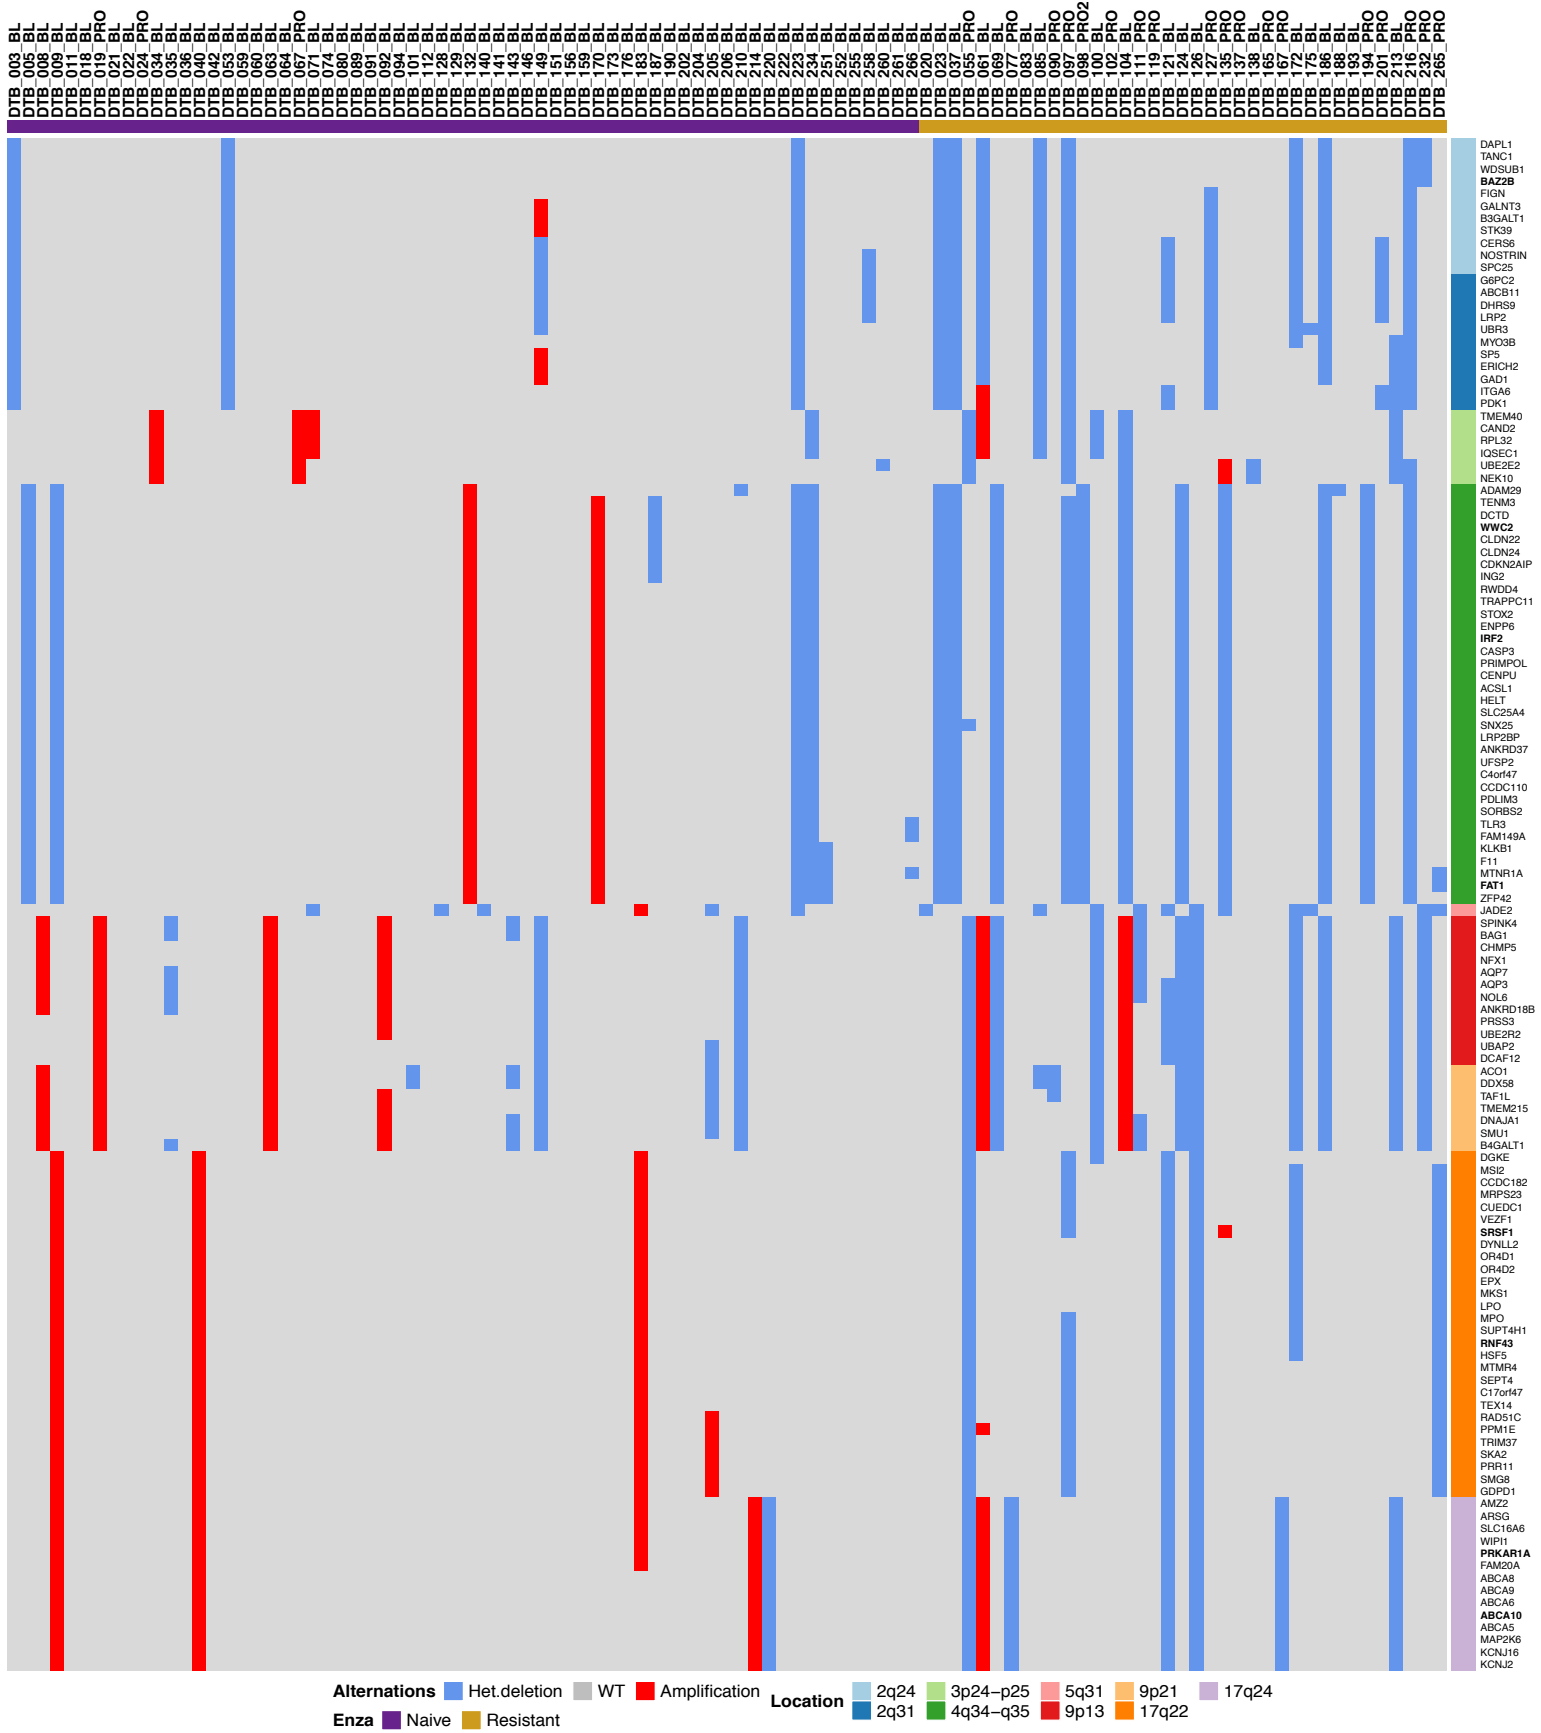

Supplementary Figure 2

Supplement: NIHMS1609735-supplement-2.pdf [file NIHMS1609735-supplement-2.pdf]

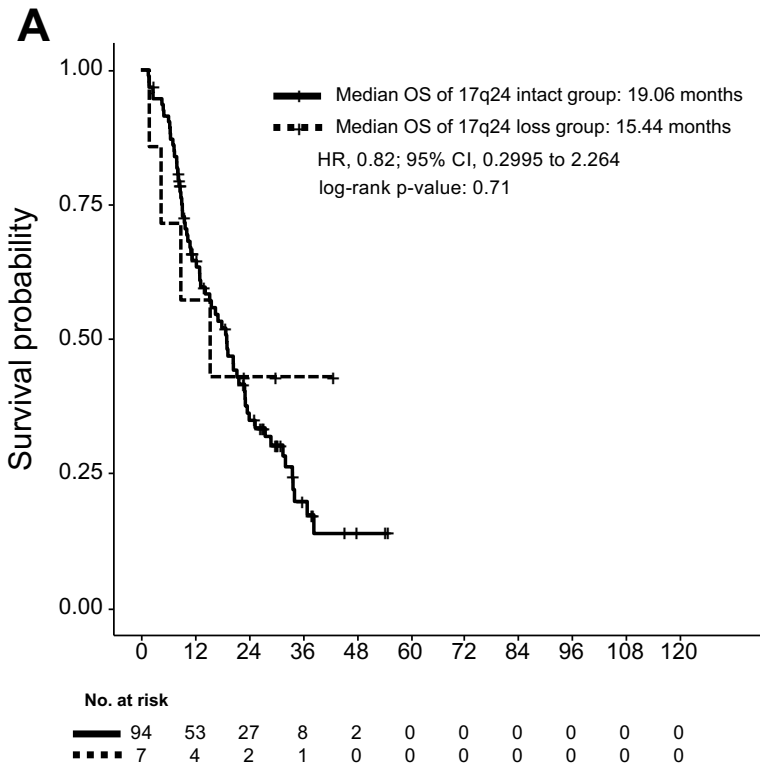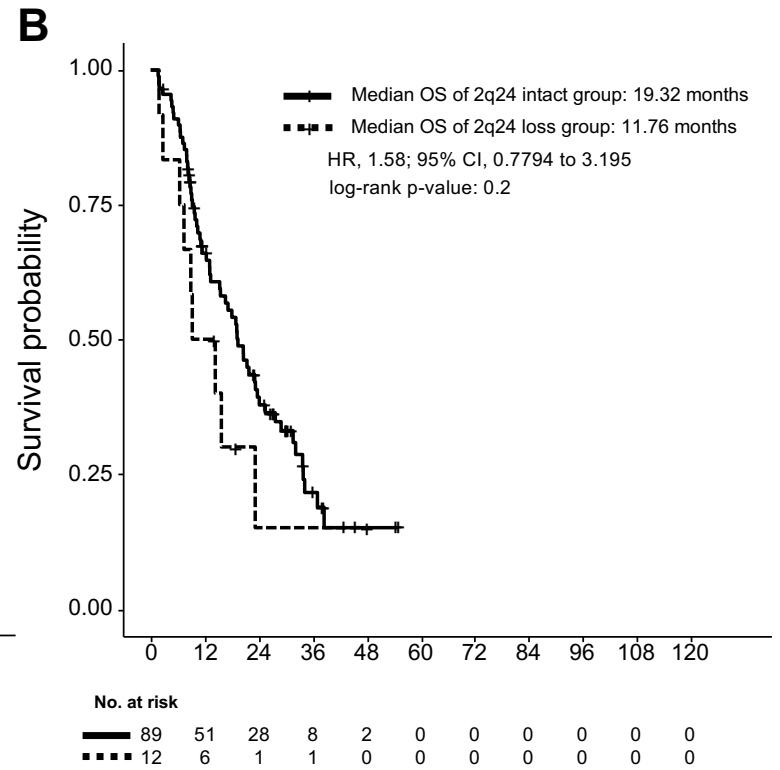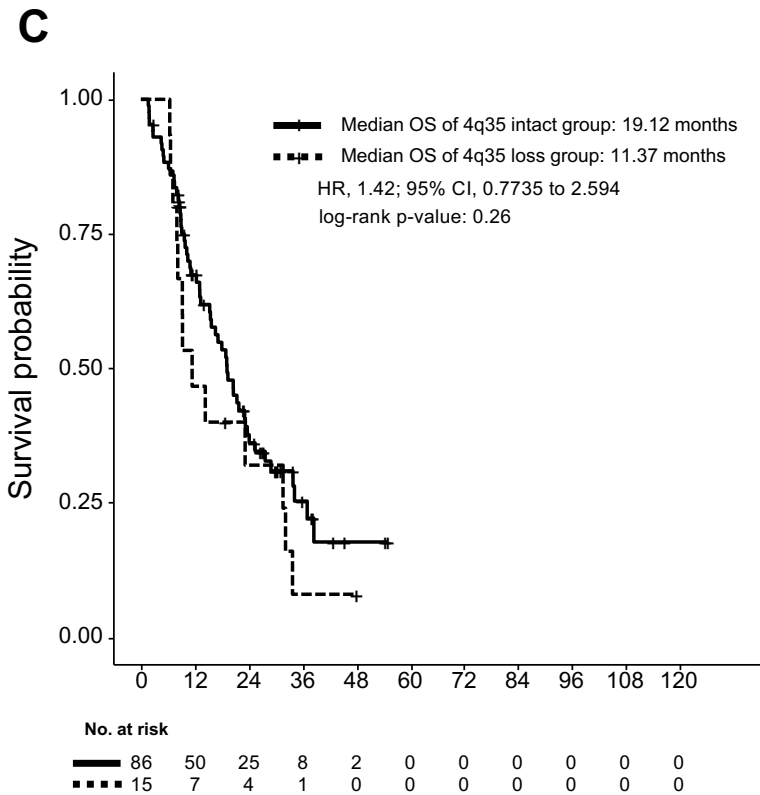

Supplementary Figure 3

Supplement: NIHMS1609735-supplement-3.pdf [file NIHMS1609735-supplement-3.pdf]

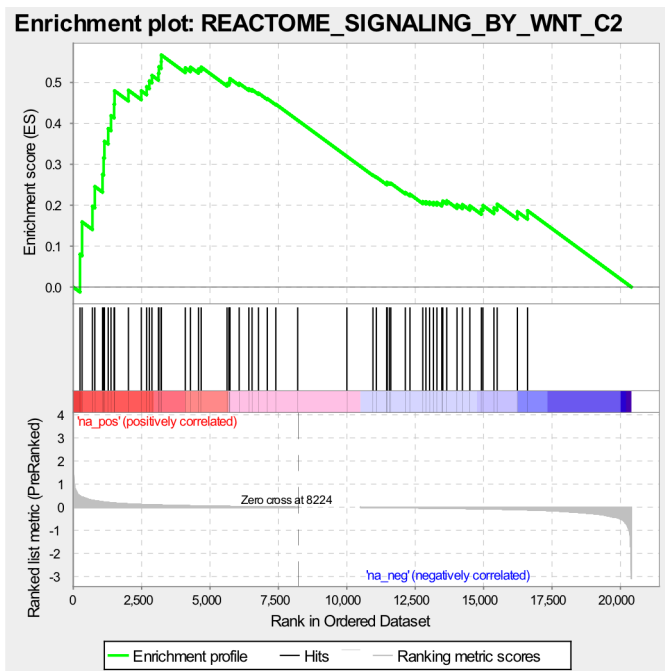

Supplementary Figure 4

Supplement: NIHMS1609735-supplement-4.pdf [file NIHMS1609735-supplement-4.pdf]
